# Supplementary material
Source: PubMed Central journal article supplement (PMC2919574)

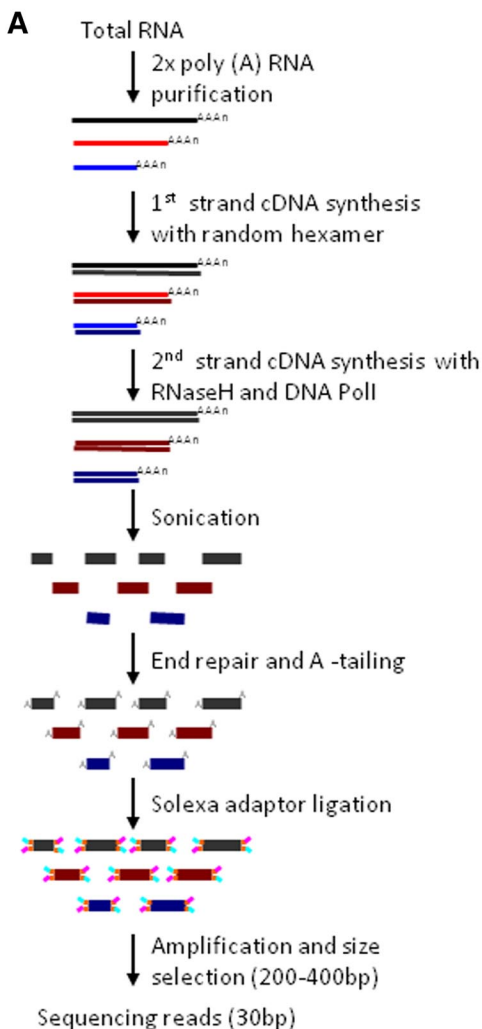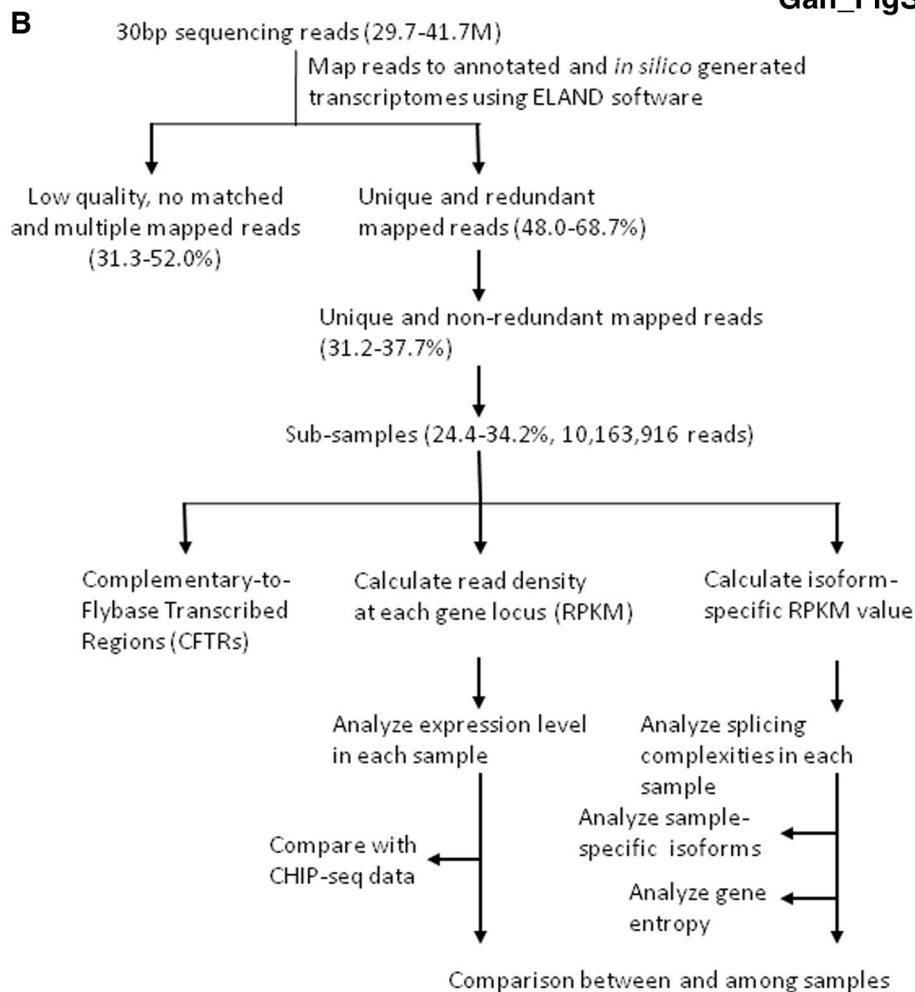

**A**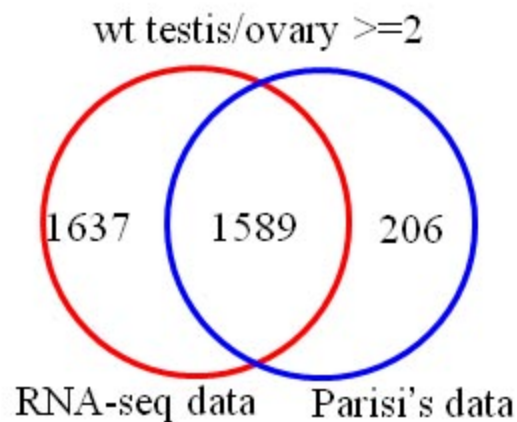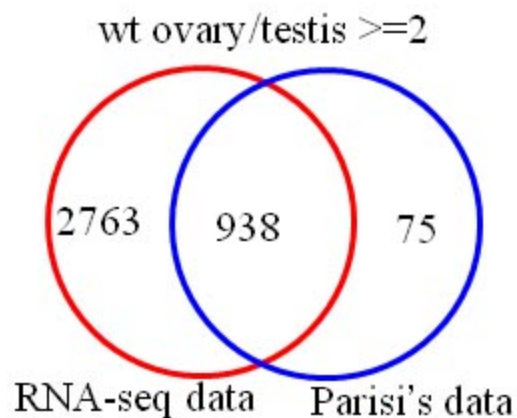**B**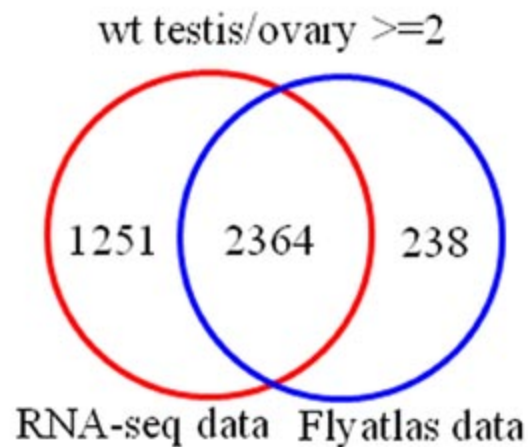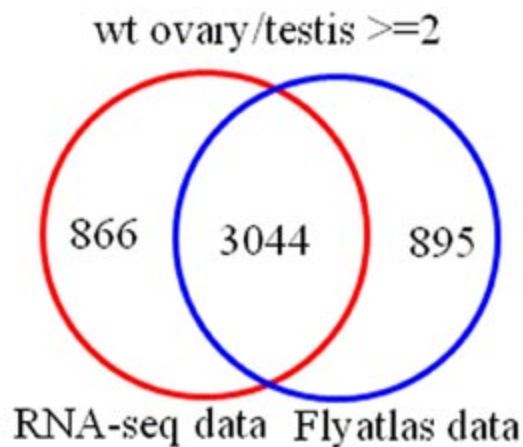

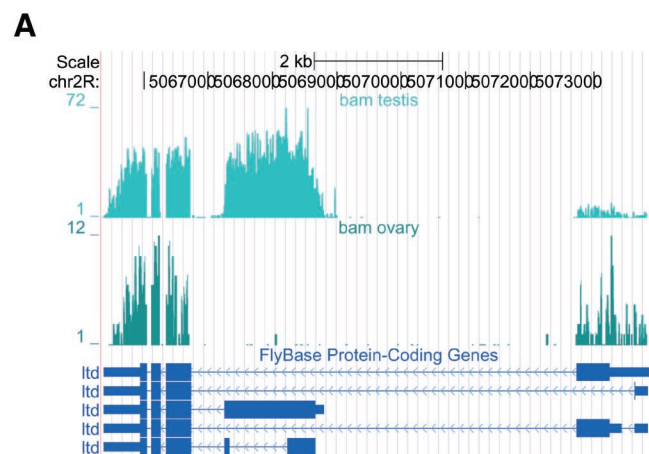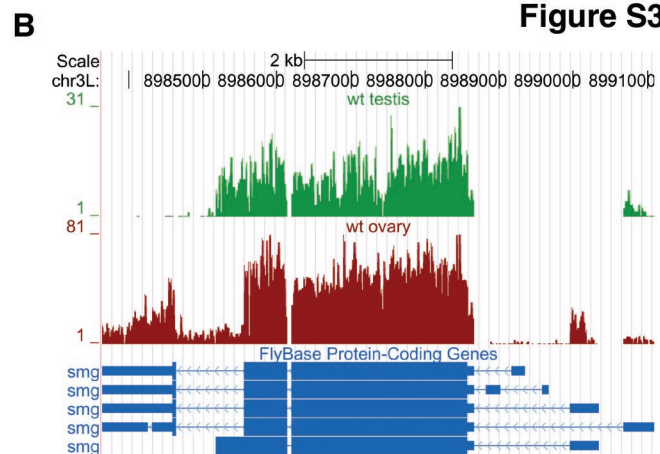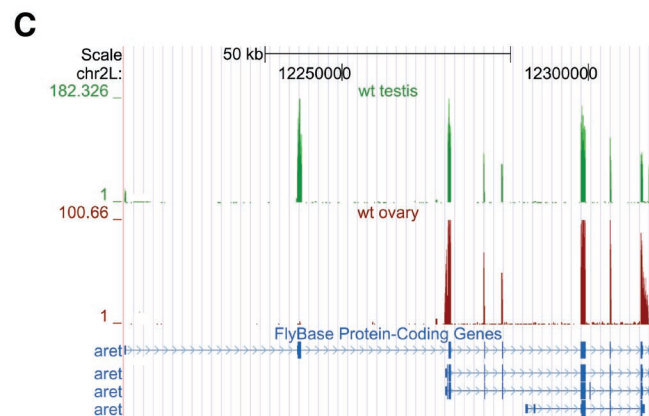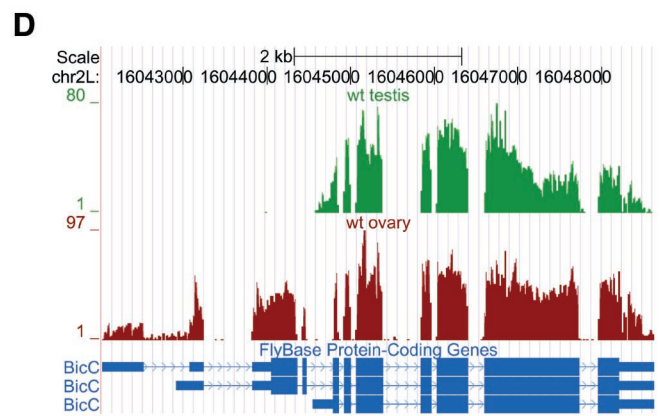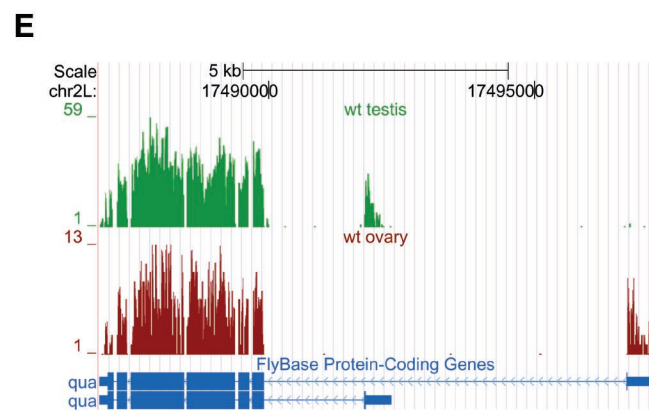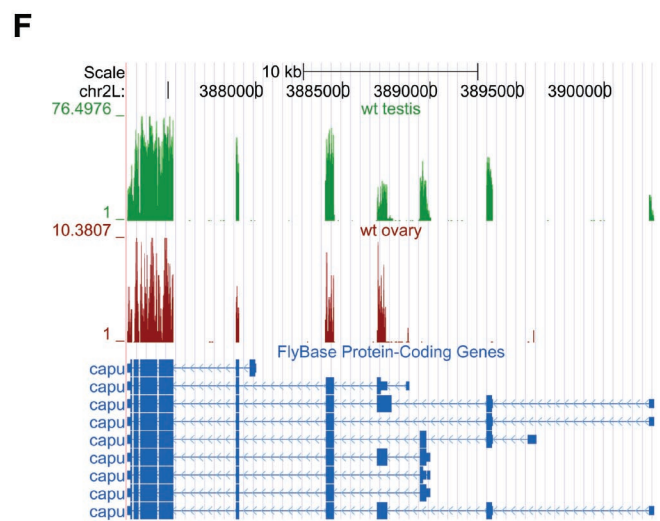

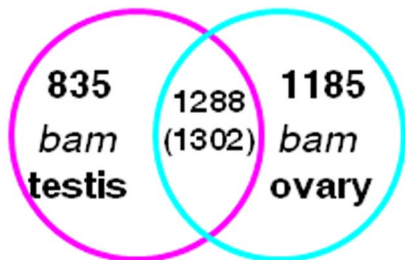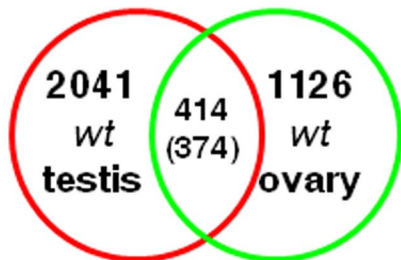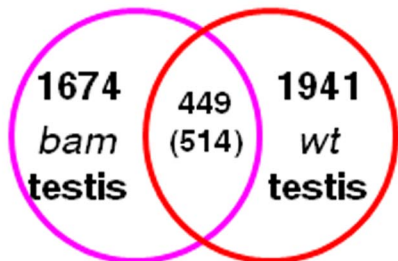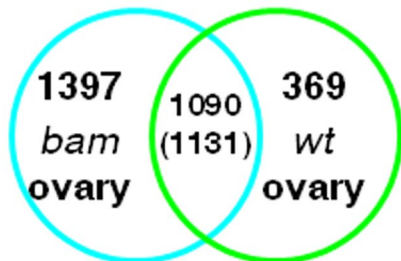

Supplement: NIHMS222587-supplement-supple_figures.pdf [file NIHMS222587-supplement-supple_figures.pdf]
